# Supplementary material for: Exploration of biochemical reactivity with a QM/MM growing string method
Source: Royal Society of Chemistry journal article supplement (doi:10.1039/d3cp05772k), 2024-01-01
Supplement: d3cp05772k1.pdf [file d3cp05772k1.pdf]

# *Supporting Information for:* Exploration of Biochemical Reactivity with a QM/MM Growing String Method

Neil R. McFarlane<sup>[a]</sup>, Jeremy N. Harvey<sup>[a]</sup>

[a] Department of Chemistry  
KU Leuven  
B-3001 Leuven Celestijnenlaan 200f- box 2404, Belgium  
**E-Mail:** neiltrory.mcfarlane@kuleuven.be  
**E-Mail:** jeremy.harvey@kuleuven.be

## Additional Figures and Tables

**Table S1:** Chronological list of QM/MM studies of reactivity in BsCM. For each study, the starting PDB structure(s), the QM method and basis set, the MM forcefield, the barrier height (in kcal/mol) with standard deviation or range (where available) are provided.

| PDB ID     | QM method/Basis set            | MM forcefield | Barrier height (kcal/mol) | Reference |
|------------|--------------------------------|---------------|---------------------------|-----------|
| 2CHT       | AM1                            | CHARMM        | 17.8                      | 1         |
| 2CHT, 1COM | HF/6-31G(d)                    | Amber         | 24.8                      | 2         |
| 2CHT, 1COM | MP2/6-31G(d)                   | Amber         | 6.4                       | 2         |
| N/R        | B3LYP/6-31G(d)                 | Amber         | 1.4                       | 3         |
| 1COM       | AM1                            | CHARMM        | 35.7                      | 4         |
| 2CHT       | HF/4-31G//cc-pVDZ              | CHARMM        | 19.7                      | 5         |
| 2CHT       | B3LYP/6-311+G(2d,p)//6-31G(d)  | CHARMM        | 2.7 – 11.9                | 6         |
| 2CHT       | AM1                            | CHARMM        | 24.5 – 31.6               | 6         |
| 2CHT       | MP2/6-31+G(d)//6-31G(d)        | CHARMM        | 7.4 – 11.0                | 7         |
| 2CHT       | B3LYP/6-311+G(2d,p)//6-31G(d)  | CHARMM        | 12.7 – 16.1               | 7         |
| 2CHT       | B3LYP/6-31G(d)                 | CHARMM        | 12.0 ± 1.7                | 8         |
| 2CHT       | B3LYP/aug-cc-pVTZ//cc-pVTZ     | CHARMM        | 10.2 ± 1.8                | 9         |
| 2CHT       | LCCSD(T0)/aug-cc-pVTZ//cc-pVTZ | CHARMM        | 13.1 ± 1.1                | 9         |
| 2CHT       | B3LYP/6-31G(d)                 | CHARMM        | 11.3 ± 1.8                | 10        |
| 2CHT       | B3LYP/6-31G(d)                 | Amber         | 12.1 ± 0.2                | 11        |
| 2CHT       | B3LYP/def2-svp                 | Amber         | 15.1                      | 12        |
| N/A        | Exp.                           |               | 12.7 ± 0.4                | 13        |

We have searched the literature for the most well-known QM/MM studies into this system (collated chronologically in **Table S1**). Overall, five QM methods have emerged, and some minor variations in MM forcefield choice. The barrier has been most accurately calculated using LCCSD(T0), where the energy barrier is predicted to be  $13.1 \pm 1.1$  kcal/mol<sup>9</sup> – in excellent agreement with experiment.<sup>13</sup> However, the high computational expense means that this method has only been used for single-point calculations on a B3LYP optimised pathway. Taking the averages of the remaining four methods (using the upper end of the ranges from ref. <sup>6,7</sup>), we find barriers of 8.7 kcal/mol (MP2),<sup>2,7</sup> 28.4 kcal/mol (AM1),<sup>1,4,6</sup> 22.3 kcal/mol (HF),<sup>2,5</sup> and 11.3 kcal/mol (B3LYP).<sup>3,6-12</sup> When comparing to the known experimental value for this reaction,<sup>13</sup> the most common choice for QM/MM reaction pathway generation is B3LYP. Removing the outlier predicted in reference <sup>3</sup>, who calculate the barrier to be unreasonably small likely due to insufficient system preparation and/or sampling, we find the average barrier to be 12.7 kcal/mol – very similar to the experimental value.<sup>13</sup> Across the studies reported herein, the size of the QM region, methods for system preparation, extent of sampling, among others, is not consistent, so these factors may also have some effect on the energy barriers.

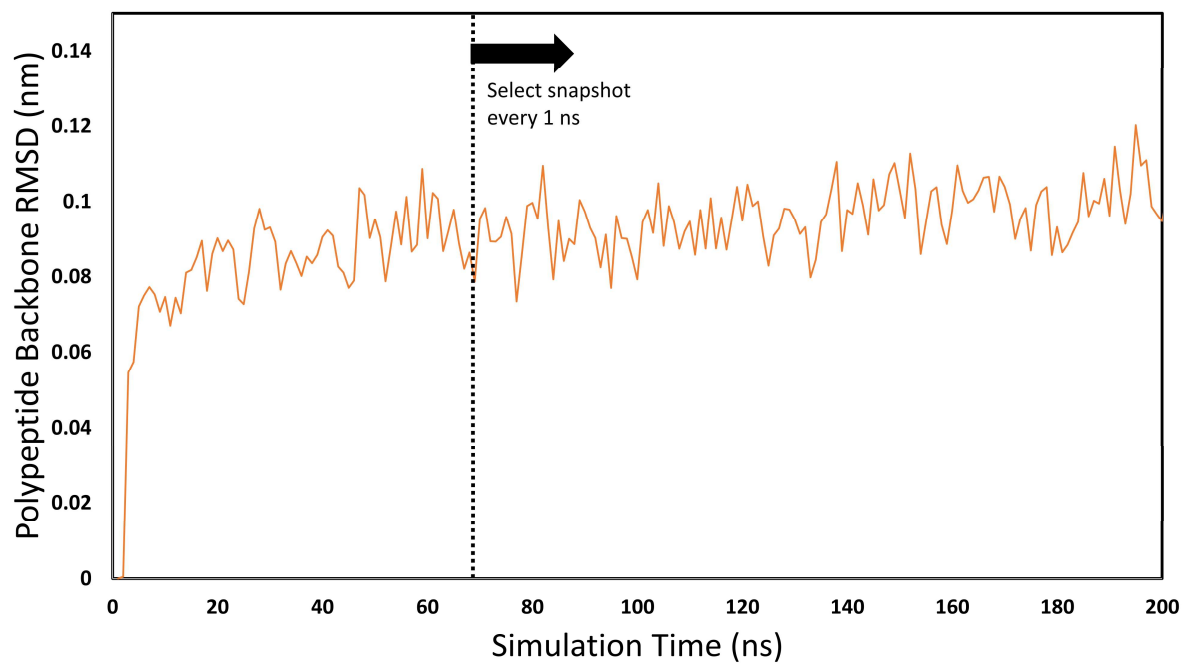

**Figure S1:** RMSD of the polypeptide backbone  $\alpha$ -carbons with respect to the starting configuration over 200 ns of simulation time, calculating the RMSD at every ns. From 68 ns, MD snapshots were taken systematically every 1 ns, as illustrated.

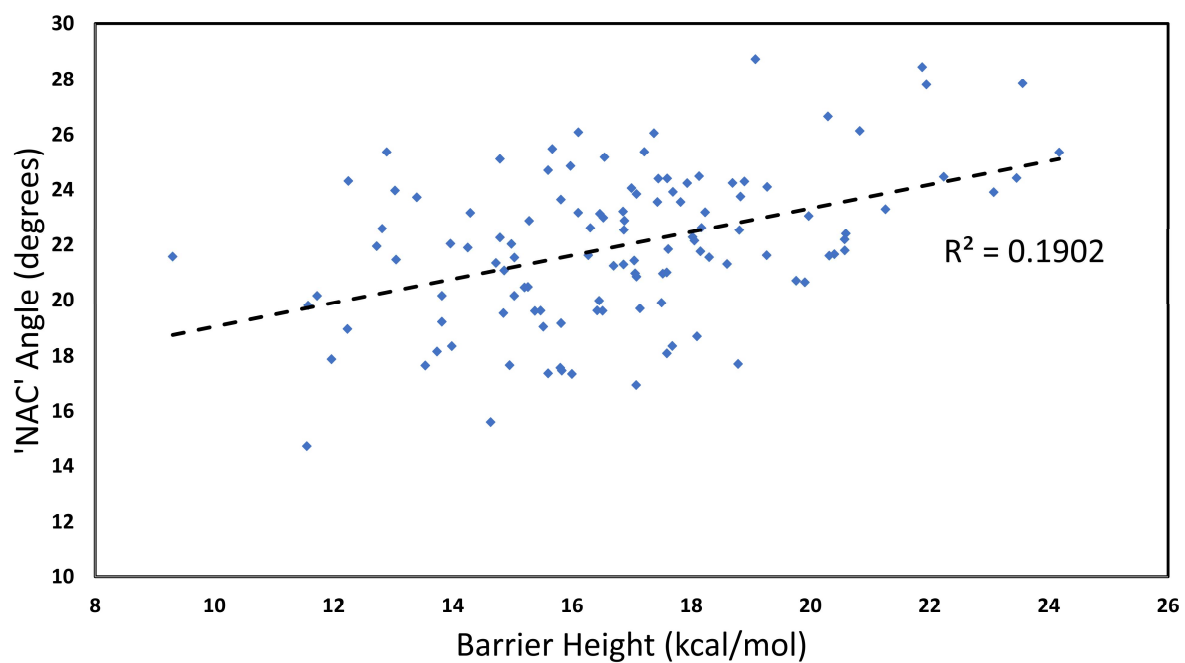

**Figure S2:** The dependency of the 'NAC' angle on the barrier height of the 117 pathways calculated herein. For a definition of the 'NAC' angle, please refer to ref. <sup>14</sup>.

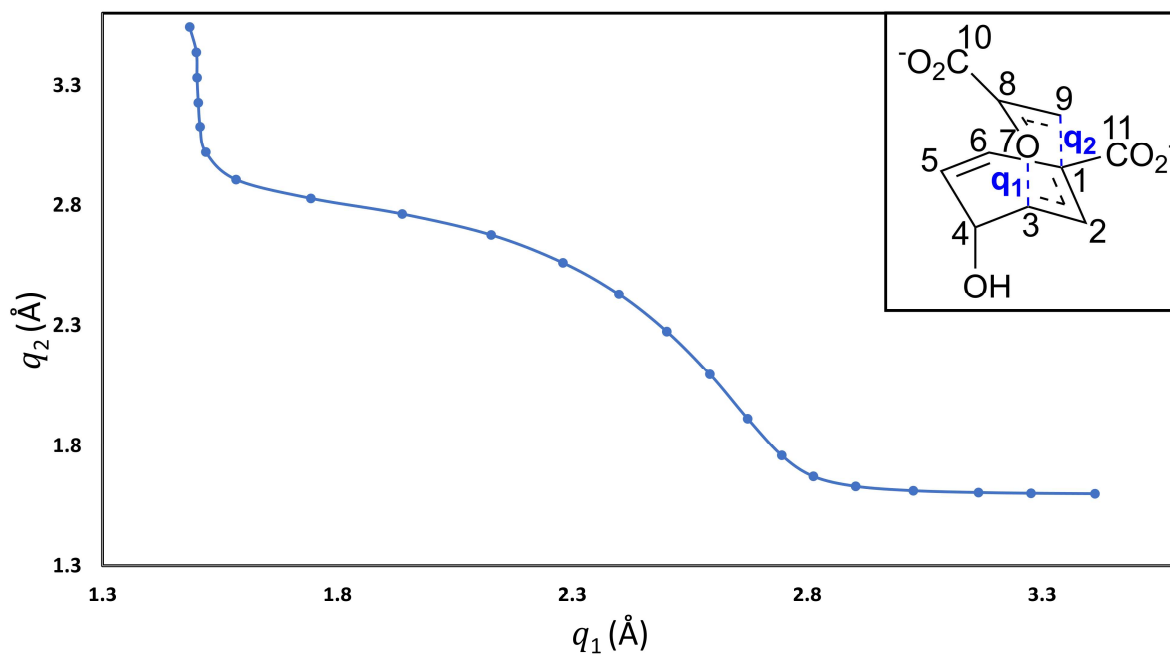

**Figure S3:** Variation of internal coordinates  $q_1$  and  $q_2$  averaged along 117 pathways generated herein.  $q_1$  is defined as  $d(C_3 - O_7)$ , and  $q_2$  is defined as  $d(C_1 - C_9)$ . An illustration of the relevant internal coordinates is given in the figure inset.

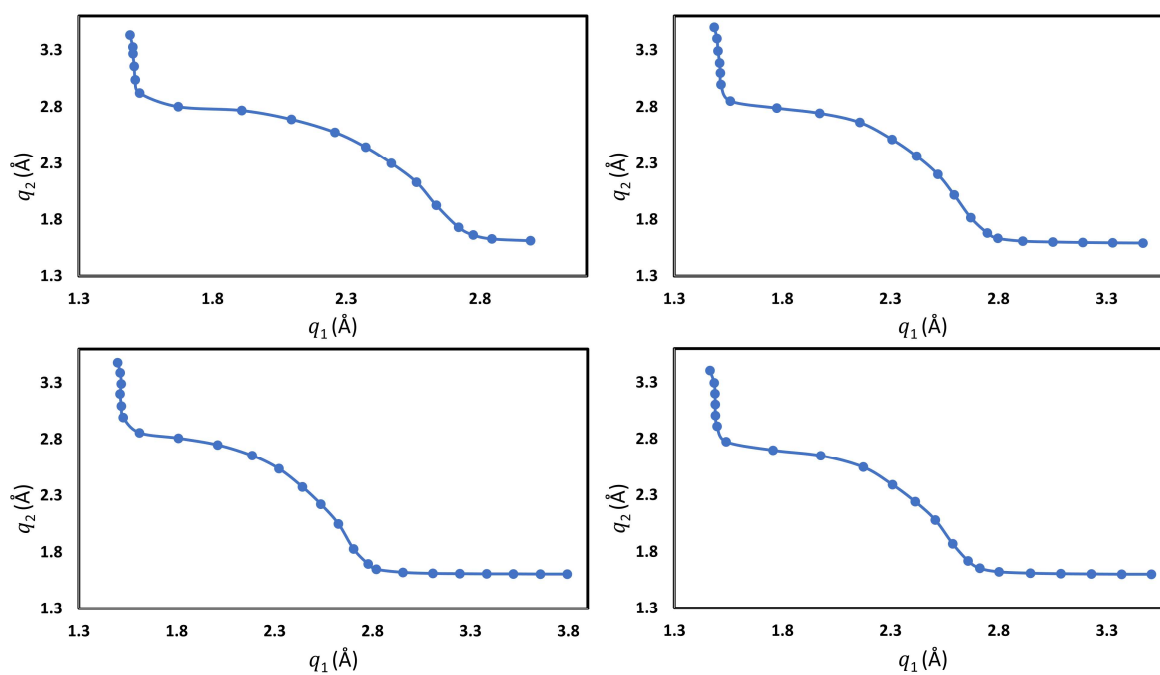

**Figure S4:** Variation of internal coordinates  $q_1$  and  $q_2$  for four of the 117 pathways generated herein.  $q_1$  is defined as  $d(C_3 - O_7)$ , and  $q_2$  is defined as  $d(C_1 - C_9)$ . An illustration of the relevant internal coordinates is given in the figure inset of **Figure S3**.

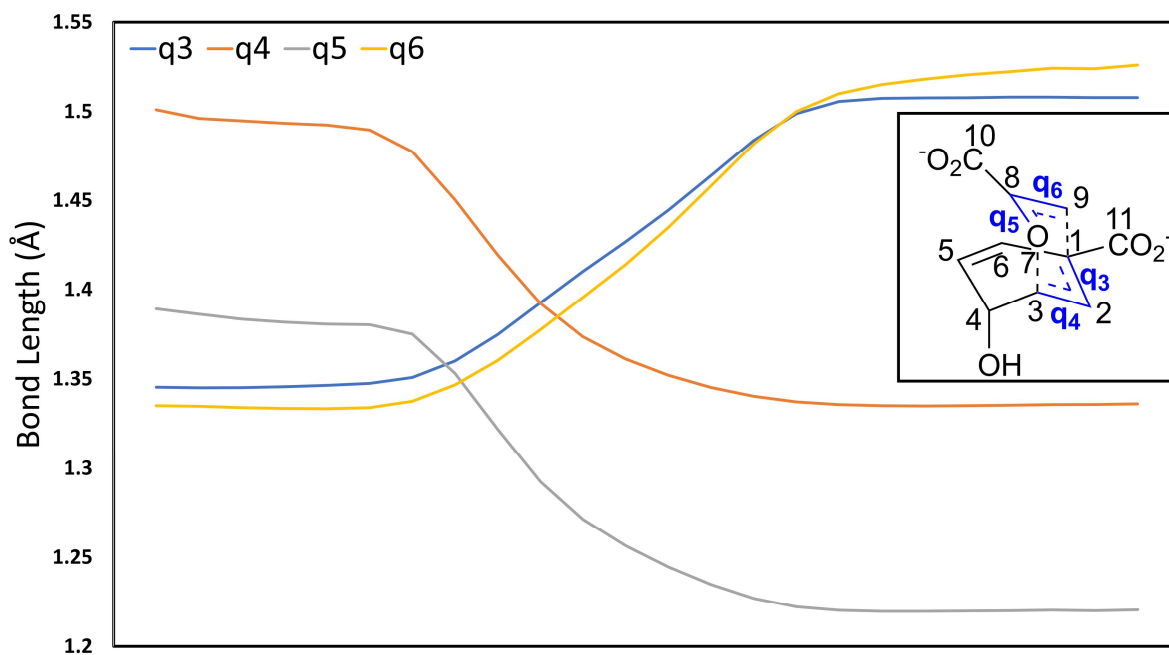

**Figure S5:** Variation of internal coordinates  $q_3$ ,  $q_4$ ,  $q_5$ , and  $q_6$  averaged along 117 pathways generated herein.  $q_3$  is defined as  $d(C_1 - C_{11})$ ,  $q_4$  is defined as  $d(C_2 - C_3)$ ,  $q_5$  is defined as  $d(O_7 - C_8)$ , and  $q_6$  is defined as  $d(C_8 - C_9)$ . An illustration of the relevant internal coordinates is given in the figure inset.

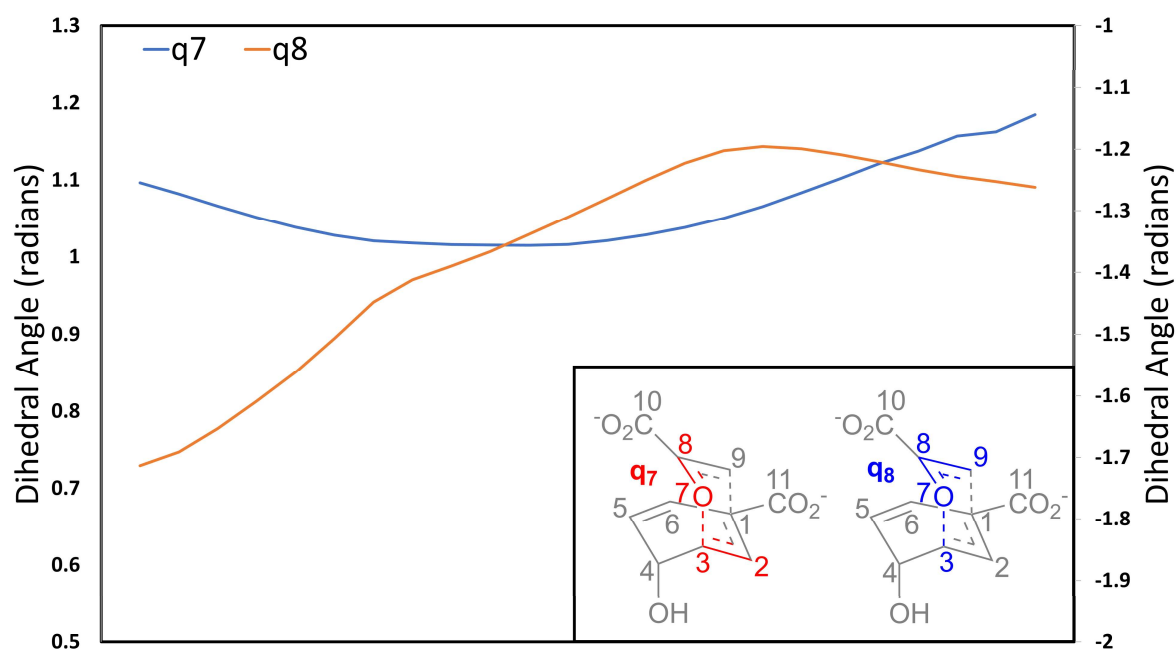

**Figure S6:** Variation of internal coordinates  $q_7$  and  $q_8$  averaged along 117 pathways generated herein.  $q_7$  is defined as  $\varphi(C_2 - C_3 - O_7 - C_8)$ , and  $q_8$  is defined as  $\varphi(C_3 - O_7 - C_8 - C_9)$ . An illustration of the relevant internal coordinates is given in the figure inset.

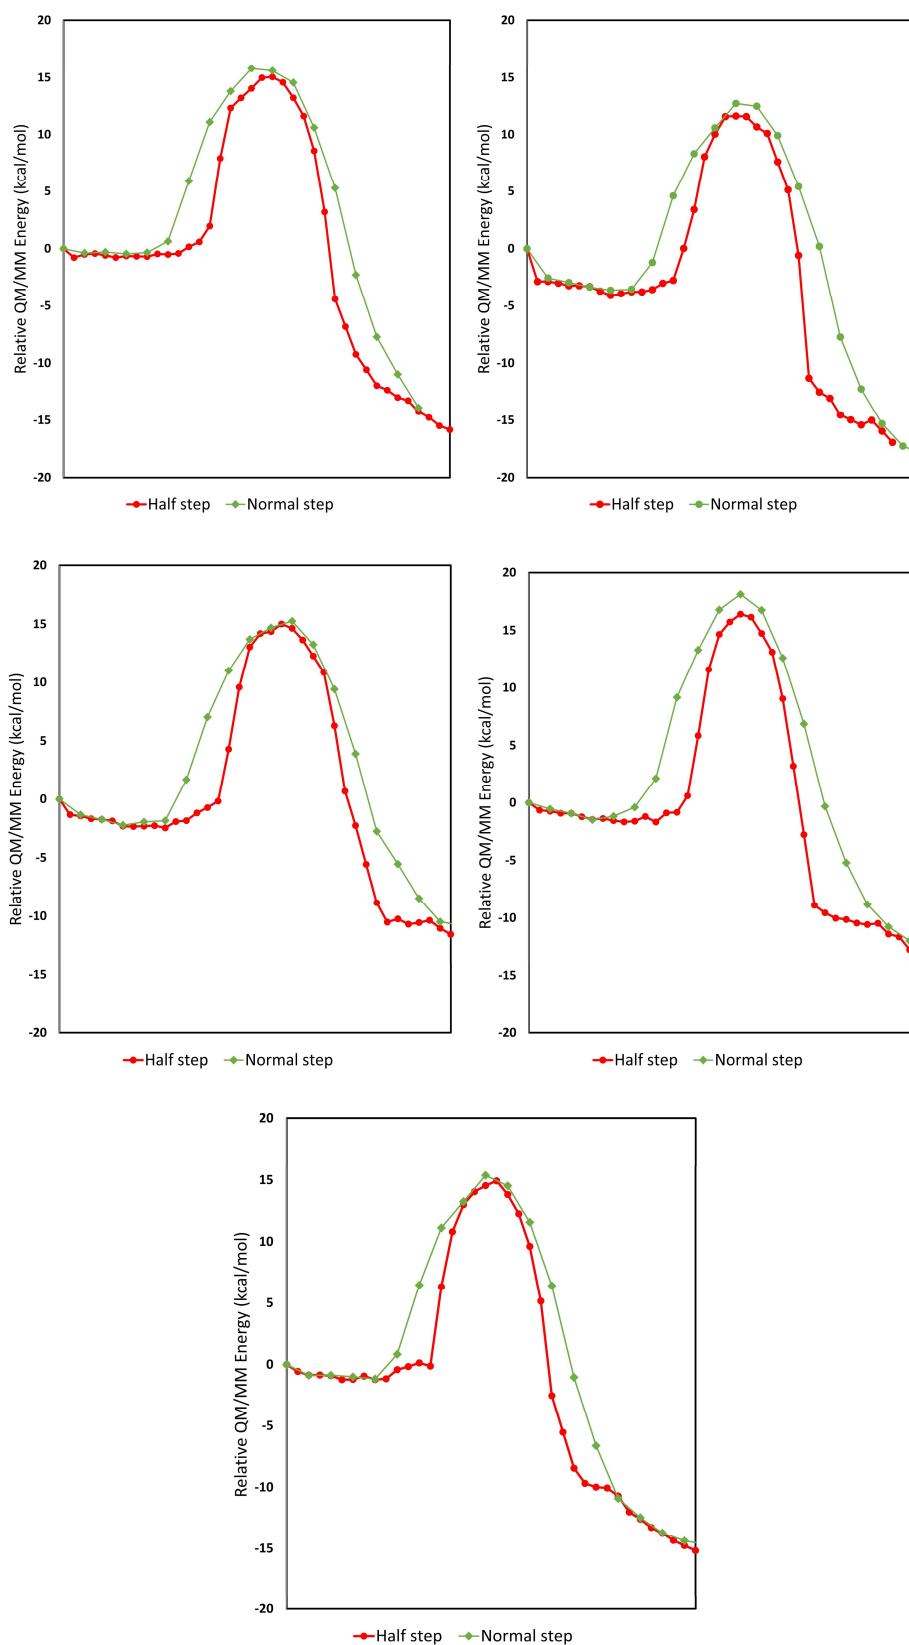

**Figure S7:** Comparison of using half-step or normal-step in the growth-phase of the QM/MM SE-GSM algorithm for five of the 117 pathways generated herein. A normal step is defined as steps of 0.1 Å and 5° for bonds and valence and/or dihedral angles, respectively. The half-step is half of these values.

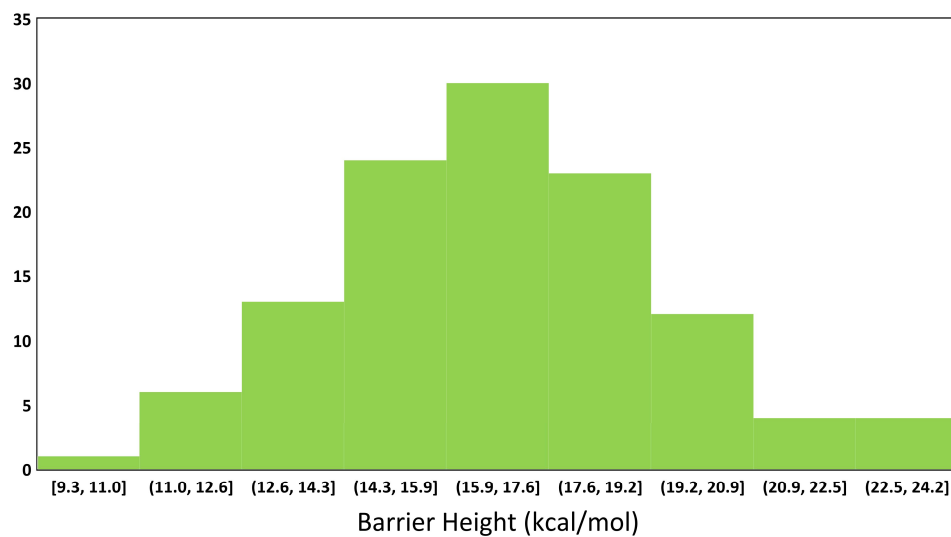

**Figure S8:** Histogram of the distribution of barrier heights for the 117 reaction pathways obtained herein.

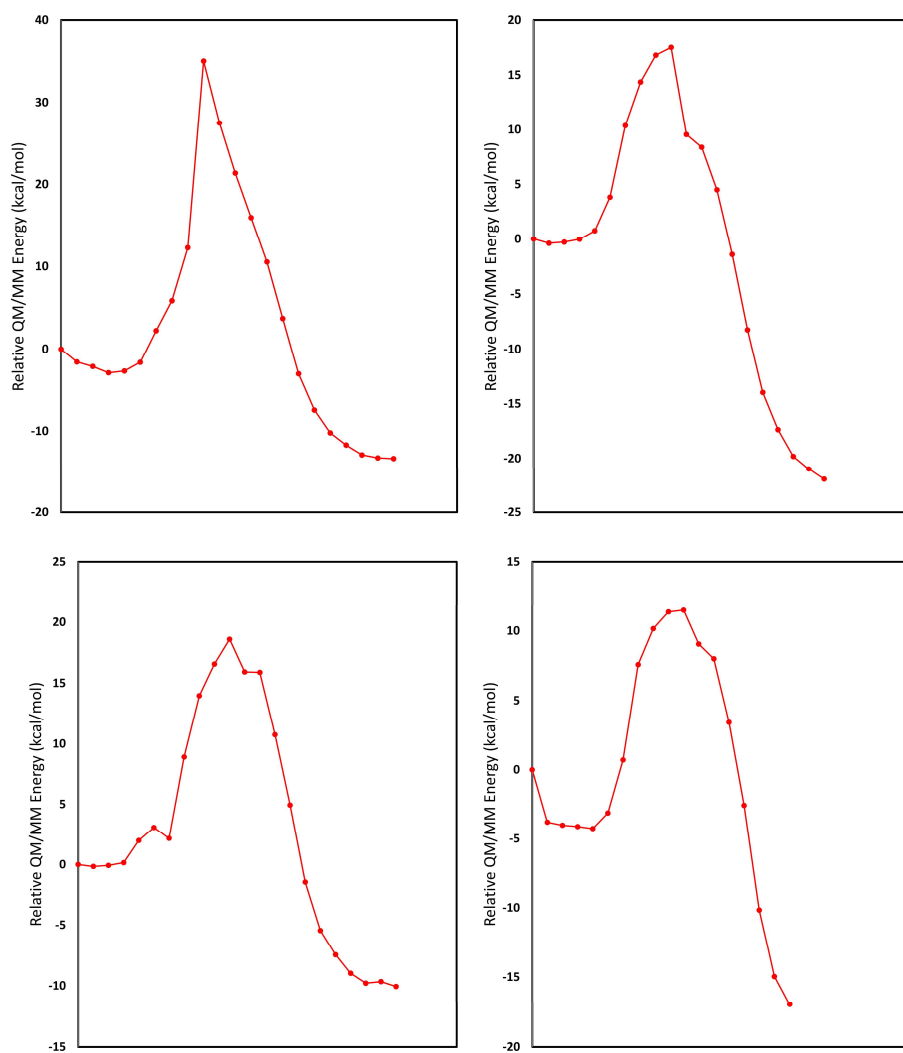

**Figure S9:** Four examples of QM/MM energy profiles which were deemed as discontinuous and therefore discarded from further analysis.

## Additional Parameters

### Chorismate Forcefield Parameters

#### **cho.itp**

; Created by cgenff\_charmm2gmx.py

[ moleculetype ]

; Name nrexcl  
CHO 3

[ atoms ]

|                                | nr     |   | type | resnr | residue | atom   | cgnr   | charge | mass | typeB | chargeB |
|--------------------------------|--------|---|------|-------|---------|--------|--------|--------|------|-------|---------|
| ; residue 1 CHO rtp CHO q qsum |        |   |      |       |         |        |        |        |      |       |         |
| 1                              | CG2DC1 | 1 | CHO  | C1    | 1       | -0.200 | 12.011 | ;      |      |       |         |
| 2                              | CG2DC2 | 1 | CHO  | C2    | 2       | -0.067 | 12.011 | ;      |      |       |         |
| 3                              | CG2DC2 | 1 | CHO  | C3    | 3       | -0.386 | 12.011 | ;      |      |       |         |
| 4                              | CG311  | 1 | CHO  | C4    | 4       | 0.295  | 12.011 | ;      |      |       |         |
| 5                              | OG311  | 1 | CHO  | O5    | 5       | -0.638 | 15.999 | ;      |      |       |         |
| 6                              | CG311  | 1 | CHO  | C6    | 6       | 0.407  | 12.011 | ;      |      |       |         |
| 7                              | CG2DC1 | 1 | CHO  | C7    | 7       | -0.319 | 12.011 | ;      |      |       |         |
| 8                              | OG301  | 1 | CHO  | O8    | 8       | -0.348 | 15.999 | ;      |      |       |         |
| 9                              | CG2D1O | 1 | CHO  | C9    | 9       | -0.205 | 12.011 | ;      |      |       |         |
| 10                             | CG2DC3 | 1 | CHO  | C10   | 10      | -0.611 | 12.011 | ;      |      |       |         |
| 11                             | CG2O3  | 1 | CHO  | C11   | 11      | 0.666  | 12.011 | ;      |      |       |         |
| 12                             | OG2D2  | 1 | CHO  | O12   | 12      | -0.740 | 15.999 | ;      |      |       |         |
| 13                             | OG2D2  | 1 | CHO  | O13   | 13      | -0.740 | 15.999 | ;      |      |       |         |
| 14                             | CG2O3  | 1 | CHO  | C14   | 14      | 0.897  | 12.011 | ;      |      |       |         |
| 15                             | OG2D2  | 1 | CHO  | O15   | 15      | -0.742 | 15.999 | ;      |      |       |         |
| 16                             | OG2D2  | 1 | CHO  | O16   | 16      | -0.742 | 15.999 | ;      |      |       |         |
| 17                             | HGP1   | 1 | CHO  | H17   | 17      | 0.414  | 1.008  | ;      |      |       |         |
| 18                             | HGA5   | 1 | CHO  | H18   | 18      | 0.230  | 1.008  | ;      |      |       |         |
| 19                             | HGA5   | 1 | CHO  | H19   | 19      | 0.230  | 1.008  | ;      |      |       |         |
| 20                             | HGA4   | 1 | CHO  | H20   | 20      | 0.145  | 1.008  | ;      |      |       |         |
| 21                             | HGA4   | 1 | CHO  | H21   | 21      | 0.124  | 1.008  | ;      |      |       |         |
| 22                             | HGA4   | 1 | CHO  | H22   | 22      | 0.150  | 1.008  | ;      |      |       |         |
| 23                             | HGA1   | 1 | CHO  | H23   | 23      | 0.090  | 1.008  | ;      |      |       |         |
| 24                             | HGA1   | 1 | CHO  | H24   | 24      | 0.090  | 1.008  | ;      |      |       |         |

[ bonds ]

|      | ai | aj | funct | c0 | c1 | c2 |
|------|----|----|-------|----|----|----|
| ; c3 |    |    |       |    |    |    |
| 1    | 2  | 1  |       |    |    |    |
| 1    | 11 | 1  |       |    |    |    |
| 1    | 7  | 1  |       |    |    |    |
| 2    | 3  | 1  |       |    |    |    |
| 2    | 20 | 1  |       |    |    |    |
| 3    | 4  | 1  |       |    |    |    |
| 3    | 22 | 1  |       |    |    |    |
| 4    | 5  | 1  |       |    |    |    |
| 4    | 6  | 1  |       |    |    |    |
| 4    | 23 | 1  |       |    |    |    |
| 5    | 17 | 1  |       |    |    |    |
| 6    | 8  | 1  |       |    |    |    |
| 6    | 7  | 1  |       |    |    |    |
| 6    | 24 | 1  |       |    |    |    |
| 7    | 21 | 1  |       |    |    |    |
| 8    | 9  | 1  |       |    |    |    |
| 9    | 10 | 1  |       |    |    |    |
| 9    | 14 | 1  |       |    |    |    |
| 10   | 18 | 1  |       |    |    |    |
| 10   | 19 | 1  |       |    |    |    |
| 11   | 12 | 1  |       |    |    |    |
| 11   | 13 | 1  |       |    |    |    |
| 14   | 15 | 1  |       |    |    |    |
| 14   | 16 | 1  |       |    |    |    |

[ pairs ]



|    | ai | aj funct | c0 | c1 | c2 |
|----|----|----------|----|----|----|
|    |    | c3       |    |    |    |
| 1  | 24 | 1        |    |    |    |
| 1  | 4  | 1        |    |    |    |
| 1  | 22 | 1        |    |    |    |
| 1  | 8  | 1        |    |    |    |
| 2  | 5  | 1        |    |    |    |
| 2  | 6  | 1        |    |    |    |
| 2  | 12 | 1        |    |    |    |
| 2  | 13 | 1        |    |    |    |
| 2  | 21 | 1        |    |    |    |
| 2  | 23 | 1        |    |    |    |
| 3  | 17 | 1        |    |    |    |
| 3  | 11 | 1        |    |    |    |
| 3  | 24 | 1        |    |    |    |
| 3  | 7  | 1        |    |    |    |
| 3  | 8  | 1        |    |    |    |
| 4  | 9  | 1        |    |    |    |
| 4  | 20 | 1        |    |    |    |
| 4  | 21 | 1        |    |    |    |
| 5  | 24 | 1        |    |    |    |
| 5  | 22 | 1        |    |    |    |
| 5  | 7  | 1        |    |    |    |
| 5  | 8  | 1        |    |    |    |
| 6  | 10 | 1        |    |    |    |
| 6  | 11 | 1        |    |    |    |
| 6  | 14 | 1        |    |    |    |
| 6  | 17 | 1        |    |    |    |
| 6  | 22 | 1        |    |    |    |
| 7  | 9  | 1        |    |    |    |
| 7  | 12 | 1        |    |    |    |
| 7  | 13 | 1        |    |    |    |
| 7  | 20 | 1        |    |    |    |
| 7  | 23 | 1        |    |    |    |
| 8  | 15 | 1        |    |    |    |
| 8  | 16 | 1        |    |    |    |
| 8  | 18 | 1        |    |    |    |
| 8  | 19 | 1        |    |    |    |
| 8  | 21 | 1        |    |    |    |
| 8  | 23 | 1        |    |    |    |
| 9  | 24 | 1        |    |    |    |
| 10 | 15 | 1        |    |    |    |
| 10 | 16 | 1        |    |    |    |
| 11 | 20 | 1        |    |    |    |
| 11 | 21 | 1        |    |    |    |
| 14 | 18 | 1        |    |    |    |
| 14 | 19 | 1        |    |    |    |
| 17 | 23 | 1        |    |    |    |
| 20 | 22 | 1        |    |    |    |
| 21 | 24 | 1        |    |    |    |
| 22 | 23 | 1        |    |    |    |
| 23 | 24 | 1        |    |    |    |

[ angles ]

|    | ai | aj | ak funct | c0 | c1 | c2 |
|----|----|----|----------|----|----|----|
|    |    |    | c3       |    |    |    |
| 2  | 1  | 11 | 5        |    |    |    |
| 2  | 1  | 7  | 5        |    |    |    |
| 11 | 1  | 7  | 5        |    |    |    |
| 1  | 2  | 3  | 5        |    |    |    |
| 1  | 2  | 20 | 5        |    |    |    |
| 3  | 2  | 20 | 5        |    |    |    |
| 2  | 3  | 4  | 5        |    |    |    |
| 2  | 3  | 22 | 5        |    |    |    |
| 4  | 3  | 22 | 5        |    |    |    |
| 3  | 4  | 5  | 5        |    |    |    |
| 3  | 4  | 6  | 5        |    |    |    |
| 3  | 4  | 23 | 5        |    |    |    |
| 5  | 4  | 6  | 5        |    |    |    |
| 5  | 4  | 23 | 5        |    |    |    |
| 6  | 4  | 23 | 5        |    |    |    |

|    |    |    |   |
|----|----|----|---|
| 17 | 5  | 4  | 5 |
| 8  | 6  | 4  | 5 |
| 8  | 6  | 7  | 5 |
| 8  | 6  | 24 | 5 |
| 4  | 6  | 7  | 5 |
| 4  | 6  | 24 | 5 |
| 7  | 6  | 24 | 5 |
| 1  | 7  | 21 | 5 |
| 1  | 7  | 6  | 5 |
| 21 | 7  | 6  | 5 |
| 9  | 8  | 6  | 5 |
| 10 | 9  | 14 | 5 |
| 10 | 9  | 8  | 5 |
| 14 | 9  | 8  | 5 |
| 9  | 10 | 18 | 5 |
| 9  | 10 | 19 | 5 |
| 18 | 10 | 19 | 5 |
| 1  | 11 | 12 | 5 |
| 1  | 11 | 13 | 5 |
| 12 | 11 | 13 | 5 |
| 9  | 14 | 15 | 5 |
| 9  | 14 | 16 | 5 |
| 15 | 14 | 16 | 5 |

[ dihedrals ]

| ;  | ai | aj | ak | al funct | c0 | c1 |
|----|----|----|----|----------|----|----|
|    | c2 |    |    | c3       | c4 | c5 |
| 11 | 1  | 2  | 3  | 9        |    |    |
| 11 | 1  | 2  | 20 | 9        |    |    |
| 7  | 1  | 2  | 3  | 9        |    |    |
| 7  | 1  | 2  | 20 | 9        |    |    |
| 2  | 1  | 11 | 12 | 9        |    |    |
| 2  | 1  | 11 | 13 | 9        |    |    |
| 7  | 1  | 11 | 12 | 9        |    |    |
| 7  | 1  | 11 | 13 | 9        |    |    |
| 2  | 1  | 7  | 21 | 9        |    |    |
| 2  | 1  | 7  | 6  | 9        |    |    |
| 11 | 1  | 7  | 21 | 9        |    |    |
| 11 | 1  | 7  | 6  | 9        |    |    |
| 1  | 2  | 3  | 4  | 9        |    |    |
| 1  | 2  | 3  | 22 | 9        |    |    |
| 20 | 2  | 3  | 4  | 9        |    |    |
| 20 | 2  | 3  | 22 | 9        |    |    |
| 2  | 3  | 4  | 5  | 9        |    |    |
| 2  | 3  | 4  | 6  | 9        |    |    |
| 2  | 3  | 4  | 23 | 9        |    |    |
| 22 | 3  | 4  | 5  | 9        |    |    |
| 22 | 3  | 4  | 6  | 9        |    |    |
| 22 | 3  | 4  | 23 | 9        |    |    |
| 3  | 4  | 5  | 17 | 9        |    |    |
| 6  | 4  | 5  | 17 | 9        |    |    |
| 23 | 4  | 5  | 17 | 9        |    |    |
| 3  | 4  | 6  | 8  | 9        |    |    |
| 3  | 4  | 6  | 7  | 9        |    |    |
| 3  | 4  | 6  | 24 | 9        |    |    |
| 5  | 4  | 6  | 8  | 9        |    |    |
| 5  | 4  | 6  | 7  | 9        |    |    |
| 5  | 4  | 6  | 24 | 9        |    |    |
| 23 | 4  | 6  | 8  | 9        |    |    |
| 23 | 4  | 6  | 7  | 9        |    |    |
| 23 | 4  | 6  | 24 | 9        |    |    |
| 4  | 6  | 8  | 9  | 9        |    |    |
| 7  | 6  | 8  | 9  | 9        |    |    |
| 24 | 6  | 8  | 9  | 9        |    |    |
| 8  | 6  | 7  | 1  | 9        |    |    |
| 8  | 6  | 7  | 21 | 9        |    |    |
| 4  | 6  | 7  | 1  | 9        |    |    |
| 4  | 6  | 7  | 21 | 9        |    |    |
| 24 | 6  | 7  | 1  | 9        |    |    |
| 24 | 6  | 7  | 21 | 9        |    |    |
| 6  | 8  | 9  | 10 | 9        |    |    |

```

6 8 9 14 9
14 9 10 18 9
14 9 10 19 9
8 9 10 18 9
8 9 10 19 9
10 9 14 15 9
10 9 14 16 9
8 9 14 15 9
8 9 14 16 9

```

[ dihedrals ]

```

;      ai      aj      ak      al funct      c0      c1
      c2      c3
9 10 14 8 2
11 13 12 1 2
14 16 15 9 2

```

### cho.prm

[ bondtypes ]

```

; i j func b0 kb
CG2D10 CG2DC3 1 0.13400000 368192.00
CG2D10 CG2O3 1 0.14925000 239341.54
CG2DC1 CG311 1 0.15020000 305432.00
CG2DC2 CG311 1 0.15020000 305432.00

```

[ angletypes ]

```

; i j k func theta0 ktheta ub0 kub
CG2DC3 CG2D10 CG2O3 5 108.060000 502.080000 0.00000000 0.00
CG2DC3 CG2D10 OG301 5 123.500000 543.920000 0.00000000 0.00
CG2O3 CG2D10 OG301 5 111.880000 574.128480 0.00000000 0.00
CG2DC1 CG2DC1 CG311 5 123.500000 401.664000 0.00000000 0.00
CG2DC2 CG2DC1 CG2O3 5 121.570000 403.002880 0.00000000 0.00
CG311 CG2DC1 HGA4 5 116.000000 334.720000 0.00000000 0.00
CG2DC2 CG2DC2 CG311 5 123.500000 401.664000 0.00000000 0.00
CG311 CG2DC2 HGA4 5 116.000000 334.720000 0.00000000 0.00
CG2D10 CG2DC3 HGA5 5 120.500000 376.560000 0.00000000 0.00
CG2D10 CG2O3 OG2D2 5 116.000000 334.720000 0.23530000 41840.00
CG2DC1 CG311 CG311 5 112.200000 267.776000 0.00000000 0.00
CG2DC1 CG311 OG301 5 99.000000 167.360000 0.00000000 0.00
CG2DC1 CG311 HGA1 5 111.500000 376.560000 0.00000000 0.00
CG2DC2 CG311 CG311 5 112.200000 267.776000 0.00000000 0.00
CG2DC2 CG311 OG311 5 110.100000 633.457600 0.00000000 0.00
CG2DC2 CG311 HGA1 5 111.500000 376.560000 0.00000000 0.00
CG2D10 OG301 CG311 5 109.000000 443.504000 0.00000000 0.00

```

[ dihedraltypes ]

```

; i j k l func phi0 kphi mult
CG2O3 CG2D10 CG2DC3 HGA5 9 180.000000 13.439845 2
OG301 CG2D10 CG2DC3 HGA5 9 180.000000 12.552000 2
CG2DC3 CG2D10 CG2O3 OG2D2 9 0.000000 3.884426 1
CG2DC3 CG2D10 CG2O3 OG2D2 9 180.000000 9.211494 2
CG2DC3 CG2D10 CG2O3 OG2D2 9 180.000000 0.108784 3
CG2DC3 CG2D10 CG2O3 OG2D2 9 0.000000 1.703306 4
OG301 CG2D10 CG2O3 OG2D2 9 0.000000 14.343589 2
OG301 CG2D10 CG2O3 OG2D2 9 0.000000 6.443360 3
OG301 CG2D10 CG2O3 OG2D2 9 180.000000 0.196648 6
CG2DC3 CG2D10 OG301 CG311 9 180.000000 3.765600 1
CG2DC3 CG2D10 OG301 CG311 9 180.000000 12.970400 2
CG2DC3 CG2D10 OG301 CG311 9 180.000000 5.020800 3
CG2O3 CG2D10 OG301 CG311 9 180.000000 3.347200 1
CG2O3 CG2D10 OG301 CG311 9 180.000000 12.552000 2
CG2O3 CG2D10 OG301 CG311 9 180.000000 4.602400 3
CG2DC2 CG2DC1 CG2DC1 CG311 9 180.000000 2.343040 1
CG2DC2 CG2DC1 CG2DC1 CG311 9 180.000000 29.288000 2
CG2O3 CG2DC1 CG2DC1 CG311 9 180.000000 2.343040 1
CG2O3 CG2DC1 CG2DC1 CG311 9 180.000000 29.288000 2
CG2O3 CG2DC1 CG2DC1 HGA4 9 180.000000 4.537548 2

```

|        |        |        |        |   |            |           |   |
|--------|--------|--------|--------|---|------------|-----------|---|
| CG2O3  | CG2DC1 | CG2DC2 | CG2DC2 | 9 | 180.000000 | 3.204944  | 1 |
| CG2O3  | CG2DC1 | CG2DC2 | CG2DC2 | 9 | 0.000000   | 14.230202 | 2 |
| CG2O3  | CG2DC1 | CG2DC2 | CG2DC2 | 9 | 0.000000   | 4.152620  | 3 |
| CG2O3  | CG2DC1 | CG2DC2 | HGA4   | 9 | 180.000000 | 4.248434  | 2 |
| CG2DC2 | CG2DC1 | CG2O3  | OG2D2  | 9 | 180.000000 | 5.439200  | 2 |
| CG2DC1 | CG2DC1 | CG311  | CG311  | 9 | 0.000000   | 2.092000  | 2 |
| CG2DC1 | CG2DC1 | CG311  | CG311  | 9 | 0.000000   | 1.255200  | 3 |
| CG2DC1 | CG2DC1 | CG311  | OG301  | 9 | 0.000000   | 2.928800  | 3 |
| CG2DC1 | CG2DC1 | CG311  | HGA1   | 9 | 0.000000   | 0.125520  | 3 |
| HGA4   | CG2DC1 | CG311  | CG311  | 9 | 0.000000   | 0.836800  | 3 |
| HGA4   | CG2DC1 | CG311  | OG301  | 9 | 0.000000   | 0.836800  | 3 |
| HGA4   | CG2DC1 | CG311  | HGA1   | 9 | 0.000000   | 0.836800  | 3 |
| CG2DC1 | CG2DC2 | CG2DC2 | CG311  | 9 | 180.000000 | 2.343040  | 1 |
| CG2DC1 | CG2DC2 | CG2DC2 | CG311  | 9 | 180.000000 | 29.288000 | 2 |
| CG311  | CG2DC2 | CG2DC2 | HGA4   | 9 | 180.000000 | 21.756800 | 2 |
| CG2DC2 | CG2DC2 | CG311  | CG311  | 9 | 0.000000   | 2.092000  | 2 |
| CG2DC2 | CG2DC2 | CG311  | CG311  | 9 | 0.000000   | 1.255200  | 3 |
| CG2DC2 | CG2DC2 | CG311  | OG311  | 9 | 180.000000 | 7.949600  | 1 |
| CG2DC2 | CG2DC2 | CG311  | OG311  | 9 | 180.000000 | 1.673600  | 2 |
| CG2DC2 | CG2DC2 | CG311  | OG311  | 9 | 180.000000 | 2.510400  | 3 |
| CG2DC2 | CG2DC2 | CG311  | HGA1   | 9 | 0.000000   | 0.125520  | 3 |
| HGA4   | CG2DC2 | CG311  | CG311  | 9 | 0.000000   | 0.836800  | 3 |
| HGA4   | CG2DC2 | CG311  | OG311  | 9 | 0.000000   | 0.836800  | 3 |
| HGA4   | CG2DC2 | CG311  | HGA1   | 9 | 0.000000   | 0.836800  | 3 |
| CG2DC1 | CG311  | CG311  | CG2DC2 | 9 | 180.000000 | 3.765600  | 1 |
| CG2DC1 | CG311  | CG311  | CG2DC2 | 9 | 180.000000 | 1.255200  | 3 |
| CG2DC1 | CG311  | CG311  | OG311  | 9 | 0.000000   | 0.836800  | 3 |
| CG2DC1 | CG311  | CG311  | HGA1   | 9 | 0.000000   | 0.815880  | 3 |
| CG2DC2 | CG311  | CG311  | OG301  | 9 | 0.000000   | 0.836800  | 3 |
| CG2DC2 | CG311  | CG311  | HGA1   | 9 | 0.000000   | 0.815880  | 3 |
| OG301  | CG311  | CG311  | OG311  | 9 | 0.000000   | 0.836800  | 3 |
| CG2DC1 | CG311  | OG301  | CG2D1O | 9 | 180.000000 | 3.807440  | 1 |
| CG2DC1 | CG311  | OG301  | CG2D1O | 9 | 0.000000   | 2.092000  | 2 |
| CG311  | CG311  | OG301  | CG2D1O | 9 | 0.000000   | 1.004160  | 1 |
| CG311  | CG311  | OG301  | CG2D1O | 9 | 0.000000   | 1.213360  | 2 |
| CG311  | CG311  | OG301  | CG2D1O | 9 | 0.000000   | 0.083680  | 3 |
| HGA1   | CG311  | OG301  | CG2D1O | 9 | 0.000000   | 0.271960  | 3 |
| CG2DC2 | CG311  | OG311  | HGP1   | 9 | 0.000000   | 5.439200  | 1 |
| CG2DC2 | CG311  | OG311  | HGP1   | 9 | 0.000000   | 2.928800  | 2 |
| CG2DC2 | CG311  | OG311  | HGP1   | 9 | 0.000000   | 0.585760  | 3 |

[ dihedraltypes ]

; 'improper' dihedrals

; i j k l func phi0 kphi

|        |        |       |        |   |          |            |
|--------|--------|-------|--------|---|----------|------------|
| CG2D1O | CG2DC3 | CG2O3 | OG301  | 2 | 0.000000 | 251.040000 |
| CG2O3  | OG2D2  | OG2D2 | CG2D1O | 2 | 0.000000 | 803.328000 |

## Optimisation Convergence Criteria

### Growth Phase

|                           |                    |
|---------------------------|--------------------|
| Change in energy:         | 0.000400 (Ha)      |
| Maximum change of X:      | 0.014000 (bohr)    |
| RMS change of X:          | 0.008000 (bohr)    |
| Maximum gradient element: | 0.010000 (Ha/bohr) |
| RMS gradient element:     | 0.004000 (Ha/bohr) |

### Optimisation Phase & Normal Criteria

|                           |                    |
|---------------------------|--------------------|
| Change in energy:         | 0.000100 (Ha)      |
| Maximum change of X:      | 0.007000 (bohr)    |
| RMS change of X:          | 0.004000 (bohr)    |
| Maximum gradient element: | 0.005000 (Ha/bohr) |
| RMS gradient element:     | 0.002000 (Ha/bohr) |

## References

- 1 P. D. Lyne, A. J. Mulholland and W. G. Richards, *J. Am. Chem. Soc.*, 1995, **117**, 11345–11350.
- 2 M. M. Davidson, I. R. Gould and I. H. Hillier, *J. Chem. Soc. Perkin Trans. 2*, 1996, 525–532.
- 3 R. J. Hall, S. A. Hindle, N. A. Burton and I. H. Hillier, *J. Comput. Chem.*, 2000, **21**, 1433–1441.
- 4 S. Martí, J. Andrés, V. Moliner, E. Silla, I. Tuñón, J. Bertrán and M. J. Field, *J. Am. Chem. Soc.*, 2001, **123**, 1709–1712.
- 5 Y. S. Lee, S. E. Worthington, M. Krauss and B. R. Brooks, *J. Phys. Chem. B*, 2002, **106**, 12059–12065.
- 6 K. E. Ranaghan, L. Ridder, B. Szefczyk, W. A. Sokalski, J. C. Hermann and A. J. Mulholland, *Mol. Phys.*, 2003, **101**, 2695–2714.
- 7 K. E. Ranaghan, L. Ridder, B. Szefczyk, W. A. Sokalski, J. C. Hermann and A. J. Mulholland, *Org. Biomol. Chem.*, 2004, **2**, 968.
- 8 F. Claeysens, K. E. Ranaghan, F. R. Manby, J. N. Harvey and A. J. Mulholland, *Chem. Commun.*, 2005, 5068.
- 9 F. Claeysens, J. N. Harvey, F. R. Manby, R. A. Mata, A. J. Mulholland, K. E. Ranaghan, M. Schütz, S. Thiel, W. Thiel and H.-J. Werner, *Angew. Chem. Int. Ed.*, 2006, **45**, 6856–6859.
- 10 F. Claeysens, K. E. Ranaghan, N. Lawan, S. J. Macrae, F. R. Manby, J. N. Harvey and A. J. Mulholland, *Org. Biomol. Chem.*, 2011, **9**, 1578.
- 11 X. Pan, R. Van, E. Epifanovsky, J. Liu, J. Pu, K. Nam and Y. Shao, *J. Phys. Chem. B*, 2022, **126**, 4226–4235.
- 12 S. A. Siddiqui and K. D. Dubey, *Phys. Chem. Chem. Phys.*, 2022, **24**, 1974–1981.
- 13 P. Kast, M. Asif-Ullah and D. Hilvert, *Tetrahedron Lett.*, 1996, **37**, 2691–2694.
- 14 S. Hur and T. C. Bruice, *J. Am. Chem. Soc.*, 2003, **125**, 10540–10542.
